# Supplementary material
Source: PubMed Central journal article supplement (PMC4378451)
Supplement: pnas.201501137SI.pdf [file pnas.201501137SI.pdf]

# Supporting Information

Sha et al. 10.1073/pnas.1501137112

## SI Text

**Paleogeographic Reconstruction.** The illustration of Pangea in Fig. 1 and Fig. S1 was redrafted from a reconstruction for the Triassic–Jurassic transition (201.6 Ma) produced by the PALEOMAP Project (1–3) displayed using GoogleEarth. The positions of the Pucara (Peru), Newark–Hartford (United States), Bristol Channel (United Kingdom), and Junggar (Western China) basins on Pangea were then translated as rigid plate south about 3° along the prime meridian to bring their paleolatitude into agreement with ref. 4. This slight reconfiguration produced virtually no change in the latitude of the Junggar Basin at about 60° N from the PALEOMAP reconstruction.

A 60° paleolatitude for the Junggar is in agreement with several additional lines of evidence. Paleomagnetic determinations of paleolatitude of Triassic–Jurassic strata from Junggar and the adjacent Tarim Basin (e.g., ref. 5), although scarce and wholly from sedimentary rocks, suggest a paleolatitude close to that of the present 45° N. The existing paleomagnetic literature, however, does not take into account the effects of compaction-induced inclination error (4, 6, 7), which is greatest at the latitudes suggested by Carroll et al. (8) for the Junggar Basin. Correcting for paleomagnetic inclination error has proved crucial in reconciling discrepant igneous and sedimentary paleomagnetic data in Eastern North America and Greenland (6) in strata correlative to those discussed here, and an approximate correction of 10–15° of paleolatitude is plausible for the Junggar Basin, an estimate of which can be tested by the collection of additional paleomagnetic data. Carroll et al. (8) show similarly high latitude for the basin (~60° N) based on the plate-tectonic context. The estimated position of 60° N as shown in the PALEOMAP reconstructions is therefore plausibly the best available estimate of latitude (Fig. 1).

**Location of the Haojiagou Section.** The Haojiagou and Badaowan formations outcrop more or less continuously in badlands along the Haojiagou (gou = valley) located at about 50 km southwest of Ürümqi City on the southern margin of the Junggar Basin of the northern Xinjiang Uygur (Uighur) Autonomous Region, Northwestern China (Figs. 1 and 2 and Figs. S1 and S2). About 1,100 m of this section is the basis of this report, beginning at ~43° 38.452' N, 87° 13.266' E and ending 43° 39.889' N, 87° 12.170' E. The section has been studied in various aspects (e.g., refs. 9–16), but only one summary on the cyclostratigraphy has been published to date (17). The data presented here were collected on the east side of the valley.

**Construction of the LITH Index.** The Haojiagou section was described by Deng et al. (18), with the lithologic data being collected and obtained during fieldwork in 1996, 1998, and 2008. The initial analysis is distinguished by the thickness and lithologic features, reflecting the paleoenvironment, of each measured layer. By using the semiquantitative classification of lithology called the “LITH” index (19), a hierarchy of cycles based on sedimentary rock types was recognized, and the different digital numbers (LITH values) were defined for various rock types (Table 1). The variations (values between 10 and 130) in LITH produce the obvious cyclicity. We converted two measurements (depth measurements and LITH measurement), by interpolating a LITH value at 0.1-m intervals within each layer, into a numerical time series forming a new time series, LITH time series, on which our times series analyses were performed (Fig. S3).

**Temporal Constraints on the Junggar Latest Triassic and Earliest Jurassic Strata.** Forty samples spanning the boundary of the Haojiagou and Badaowan formations, Junggar Basin, China were examined for palynology. Of these samples, 35 were usefully productive samples (Fig. S3) and formed the basis of the range chart shown in Fig. 3. Our analysis focuses on the ETE, supercedes the palynological analysis in Sha et al. (15), and includes more samples for higher resolution. Samples were processed at Global GeoLab Ltd., Canada ([www.globageolab.com](http://www.globageolab.com)) following standard methods. The palynological slides and residues are stored at the Department of Palaeobiology, Swedish Museum of Natural History.

The sedimentary successions of the Haojiagou and Badaowan formations at the Haojiagou section yielded well-preserved miospore assemblages of medium diversity; 60 species of fossil pollen and spore taxa were identified in this study, together with a putative dinoflagellate (*Chytroeisphaeridia* sp.) and the chlorophyte (green alga) *Botryococcus braunii*. The age assessment is based on a combination of last and first appearance datums for key taxa (Fig. S3). Typical Triassic elements persist up to bed 52, including *Lunatisporites rhaeticus* and *Limboisporites* spp., whereas the abundant occurrence of *Retritriletes semimuris* and *Retritriletes austroclavatidites* in bed 53 suggests a Hettangian age (20), and the end of the ETE interval (Fig. 3 and Fig. S3).

The presence of *Cerebropollenites macroverrucosus* and *Calialasporites trilobatus* in bed 81 suggests a Sinemurian–Pliensbachian age (21) for that level. The comparison with European and Australian palynostratigraphical schemes is tentative because these regions represent different floral paleo-provinces from those previously described for this region (9, 12) and because correlative zonation schemes between the regions have not been erected. Identification of the Hettangian–Sinemurian boundary to the Haojiagou section is more problematic because there is apparently no change in sporomorph composition across that boundary at the base-Sinemurian GSSP in the United Kingdom or Europe in general (22–24).

Thus, based on the palynology, we have placed the top of the extinction interval, still in the late Rhaetian, at the last appearance datum (LAD) of the taeniate gymnosperm pollen *L. rhaeticus*. This sporomorph is regarded as a near-end-Rhaetian marker in Europe (including the United Kingdom), Greenland, and Eastern North America (25–29), where its last appearance occurs close to and above the initial expression of the end-Triassic extinction. In Eastern North America, the last appearance of this pollen taxon occurs in strata about 60 ky younger than the initiation of the initial ETE, as constrained by both U-Pb dates and astrochronology (30), and the Triassic–Jurassic boundary occurs about 40 ky after that based on extrapolation and correlation with United Kingdom sections (31). Thus, we use the LAD of *L. rhaeticus* as a tie point to pin the ETE within the studied successions (Figs. 2 and 3).

In terms of floral provinces, Sun et al. (ref. 13 and references therein) argue that the Haojiagou (Late Triassic) floral assemblage belongs to the *Danaeopsis–Symopteris* assemblages [updated from the original *Danaeopsis–Bernoullia* assemblage because the latter name has a prior synonym that is a malvaceous angiosperm (Bombacaceae)] (32), “Northern China” continental floristic province whereas the Badaowan (Early Jurassic) floras belong to the *Coniopters–Phoenicopsis* or “Siberian” continental floristic province, both of which are typical northern-hemisphere, high-latitude humid assemblages. The transition between the *Danaeopsis–Symopteris* and *Coniopters–Phoenicopsis* assemblages around the Triassic–Jurassic transition is interpreted as indicating a transition to more humid

and warm conditions (13). Generally, warm and humid conditions in both formations are consistent with the broad-leaf gymnosperm assemblage and the presence of common coal and are consistent with many sedimentary basins in the early Mesozoic northern-hemisphere high latitudes (33, 34) although they clearly represent nonanalog communities and although it is very difficult to assess whether these assemblages have any time significance.

In contrast, the numerical ages of the ETE are now well-understood at  $201.564 \pm 0.015$  Ma (30), the Triassic–Jurassic boundary between  $201.32 \pm 0.13$  Ma and  $201.39 \pm 0.14$  Ma (35) [mean of  $201.36 \pm 0.14$  Ma, rms error], and the Hettangian–Sinemurian boundary at about  $199.46 \pm 0.17$  Ma (corrected from the original  $199.43 \pm 0.10$  Ma date of ref. 36), based on zircon  $^{206}\text{Pb}/^{238}\text{U}$  ages and astrochronology, with varying degrees of precision and additional uncertainty (up to 0.1%) due to very slightly different interlaboratory methods. The duration of the Hettangian is thus now well-established, with the most recent estimates being 2 My (U-Pb; ref. 37), 1.8 My (astrochronology; refs. 31, 38, and 39), and  $1.88 \pm 0.16$  My (U-Pb; refs. 30 and 36). These durations are all close to the duration of 2 My for the Hettangian in the most recent timescale compilation (40). Based on the U-Pb dates and astrochronology in ref. 30, we used the last appearance of *L. rhaeticus* to tie the Badaowan section at  $201.50 \pm 0.1$  Ma (Figs. 2 and 3 and Fig. S3).

**Analytical Methods.** The FFT and MTM spectra (Fig. 4 and Figs. S4 and S5) were developed using Analyseries (2.0) (41), and the evolutive wavelet spectrum was computed using the Matlab script of Torrence and Compo (42) ([paos.colorado.edu/research/wavelets/](http://paos.colorado.edu/research/wavelets/)). For all data, the original depth series was interpolated with an increment of 0.1 m. Data were divided into two series: a low LITH index series with values from 20 to 60, which were then reversed

and rescaled to range from 0 to 40 (with 40 being fine grained and 0 being coarse), and a high LITH index series with values from 60 to 140 (with 60 being fine grained and 140 being coarse). For the MTM spectra the following Analyseries options were used: linear trend was removed, medium confidence vs. resolution was selected, width.ndata product was 4, six windows were used, output was resampled from 0 to 2 with a step of 0.001, and inferior and superior error bars and amplitude spectra were computed (for Fig. 4 and Fig. S4). For the FFT, periodograms (power spectra) were prepared with the following Analyseries options: linear trend was removed, Bartlett window was used, and output was resampled from 0 to 2 with a step of 0.001. Note that Analyseries does not use adaptive weighting and thus tends to overestimate the number of significant harmonics in frequencies with low power. Consequently, we regarded only cycles with high power and high f-test statistics as having been meaningful. For the 405-ky filtered clipped-LITH data, a frequency of 0.0289855 m per cycle was used with a bandwidth of 0.005, with a Gaussian shape. For the 405-ky frequency of the total organic carbon (TOC) data of ref. 38, a frequency of 0.00062486 cm per cycle was used with a bandwidth of 0.0003 and a Gaussian shape. The modulation of obliquity (Fig. S7) is based on bandpass filtering the clipped LITH series with a 0.275 m per cycle frequency and a bandwidth of 0.02 and a Gaussian shape, which was then demodulated [amplitude modulated (AM) filtered]. The result was compared with a bandpass filtering of the clipped LITH series at a frequency of 0.0142857 m per cycle and a bandwidth of 0.01 and a Gaussian shape. The wavelet spectra were computed using the Matlab script of Torrence and Compo (42) ([paos.colorado.edu/research/wavelets/software.html](http://paos.colorado.edu/research/wavelets/software.html)) with  $dt = 0.1$  and all other options at the default values.

- Paleomap Project. Available at [www.globalgeology.com/](http://www.globalgeology.com/). Accessed February 26, 2015.
- Scotese CR, Moore TL, Dreher CT (2013) Teaching and research tools for deep time studies: Ancient Earth app, Global Geology website, and the PALEOMAP PaleoAtlas for ArcGIS. *GSA Abstracts with Programs* 45:233.
- Scotese CR (2013) *PALEOMAP PaleoAtlas for ArcGIS, Jurassic & Triassic* (PALEOMAP Project, Evanston, IL), Vol 3.
- Kent DV, Tauxe L (2005) Corrected Late Triassic latitudes for continents adjacent to the North Atlantic. *Science* 307(5707):240–244.
- Choulet F, et al. (2013) First Triassic palaeomagnetic constraints from Junggar (NW China) and their implications for the Mesozoic tectonics in Central Asia. *J Asian Earth Sci* 78:371–394.
- Tauxe L (2005) Inclination flattening and the geocentric axial dipole hypothesis. *Earth Planet Sci Lett* 233:27–261.
- Tauxe L, Kodama KP, Kent DV (2008) Testing corrections for paleomagnetic inclination error in sedimentary rocks: A comparative approach. *Phys Earth Planet Inter* 169:152–165.
- Carroll AR, Graham SA, Smith ME (2010) Walled sedimentary basins of China. *Basin Res* 22(1):17–32.
- Ashraf AR, et al. (1999) The Triassic–Jurassic boundary in the Junggar Basin (NW China): Preliminary palynostratigraphic results. *Acta Palaeobotanica* 1999(Suppl 2):85–91.
- Ashraf AR, Wang X, Sun G, Li J, Mosbrugger V (2001) Palynostratigraphic analysis of the Huangshanjie-, Haojiagou- and Badaowan formations in the Junggar Basin (NW China). *Proceedings of the Sino-German Cooperation Symposium on Paleontology, Geological Evolution and Environmental Changes of Xinjiang, China* (Jilin University, Ürümqi, China), pp 40–64.
- Ashraf AR, Sun Y-W, Li J, Sun G, Mosbrugger V (2004) Palynostratigraphic analysis of the Huangshanjie-, Haojiagou-, Badaowan-, Sangonghe- and Xishanyao Formation (Upper Triassic–Middle Jurassic) in the Southern Junggar Basin (NW China). *Proceedings of the Sino-German Cooperation Symposium on Paleontology, Geological Evolution and Environmental Changes of Xinjiang, China, Ürümqi*, eds Sun G, Mosbrugger V, Ashraf AR, Sun YW (Jilin University, Ürümqi, China), pp 41–44.
- Ashraf AR, et al. (2010) Triassic and Jurassic palaeoclimate development in the Junggar Basin, Xinjiang, northwest China: A review and additional lithological data. *Palaeobiodivers Palaeoenviro* 90(3):187–201.
- Sun G, Mosbrugger V, Miao Y-Y, Ashraf AR (2010) The Upper Triassic to Middle Jurassic strata and floras of the Junggar Basin, Xinjiang, Northwest China. *Palaeobiol Palaeoenviro* 90(3):203–214.
- Hornung J, Hinderer M (2011) Depositional dynamics and preservation potential in a progradational lacustrine fluvio-deltaic setting: Implications for high-resolution sequence stratigraphy (Upper Triassic, Northwestern China). *From River to Rock Record: The Preservation of Fluvial Sediments and Their Subsequent Interpretation*, eds Davidson SK, Leleu S North CP (SEPM Society for Sedimentary Geology, Tulsa, OK), SEPM Special Publication No. 97, pp. 281–310.
- Sha J, et al. (2011) The stratigraphy of the Triassic–Jurassic boundary successions of the southern margin of Junggar Basin, northwestern China. *Acta Geol Sin* 85(2): 421–436.
- Sha J, et al. (2012) *Type-Boundary Section of Non-Marine Base-Jurassic and Regional Correlation: Research Report Establishing Stages of Major Dates in China*, ed The Third National Stratigraphical Committee of China (Geological Publishing House, Beijing), pp 148–159. In Chinese.
- Sha J, et al. (2010) Astronomical calibrated time intervals for the non-marine Badaowan Formation, Lower Jurassic in Haojiagou of Ürümqi City, Western China. *Earth Sci Front* 17(Special Issue):22–23.
- Deng S, et al. (2010) *The Jurassic System of Northern Xinjiang, China* (University of Science and Technology of China Press, Hefei, China).
- Xu D, Ji X, Ceng X, Luo Z (2000) Study of high resolution continental cyclostratigraphy: Example of Badaowan Formation in Haojiagou, Xinjiang. *Proceedings of the Third National Stratigraphical Conference of China* (Geological Publishing House, Beijing), pp. 191–196. In Chinese.
- Vajda V, Bercovici A (2014) The global vegetation pattern across the Cretaceous–Paleogene mass extinction interval: A template for other extinction events. *Global Planet Change* 122:29–49.
- Bomfleur B, McLoughlin S, Vajda V (2014) Fossilized nuclei and chromosomes reveal 180 million years of genomic stasis in royal ferns. *Science* 343(6177):1376–1377.
- Weiss M (1989) Die Sporenfloren aus Rät und Jura Südwest-Deutschlands und ihre Beziehung zur Ammoniten-Stratigraphie. *Palaeontographica B* 215:1–168.
- Page KN, et al. (2000) East Quantoxhead, Somerset: A candidate global stratotype section and point for the base of the Sinemurian Stage (Lower Jurassic). *GeoResearch Forum* 6:163–171.
- Bloos G, Page KN (2002) Global stratotype section and point for base of the Sinemurian Stage (Lower Jurassic). *Episodes* 25(1):22–28.
- Kürschner WM, Hergreen GFW (2010) Triassic palynology of central and north-western Europe: A review of palynofloral diversity patterns and biostratigraphic subdivisions. *Geol Soc Lond Spec Publ* 334:263–283.
- Bonis NR, Kürschner WM (2012) Vegetation history, diversity patterns, and climate change across the Triassic/Jurassic boundary. *Paleobiology* 38(2):240–264.
- Mander L, Kürschner WM, McElwain JC (2013) Palynostratigraphy and vegetation history of the Triassic–Jurassic transition in East Greenland. *J Geol Soc London* 170:37–46.
- Cirilli S, et al. (2009) Latest Triassic onset of the Central Atlantic Magmatic Province (CAMP) volcanism in the Fundy Basin (Nova Scotia): New stratigraphic constraints. *Earth Planet Sci Lett* 286(3–4):514–525.
- Bonis NR, Ruhl M, Kürschner WM (2010) Milankovitch-scale palynological turnover across the Triassic–Jurassic transition at St. Audrie's Bay, SW UK. *J Geol Soc London* 167:877–888.
- Blackburn TJ, et al. (2013) Zircon U-Pb geochronology links the end-Triassic extinction with the Central Atlantic Magmatic Province. *Science* 340(6135):941–945.



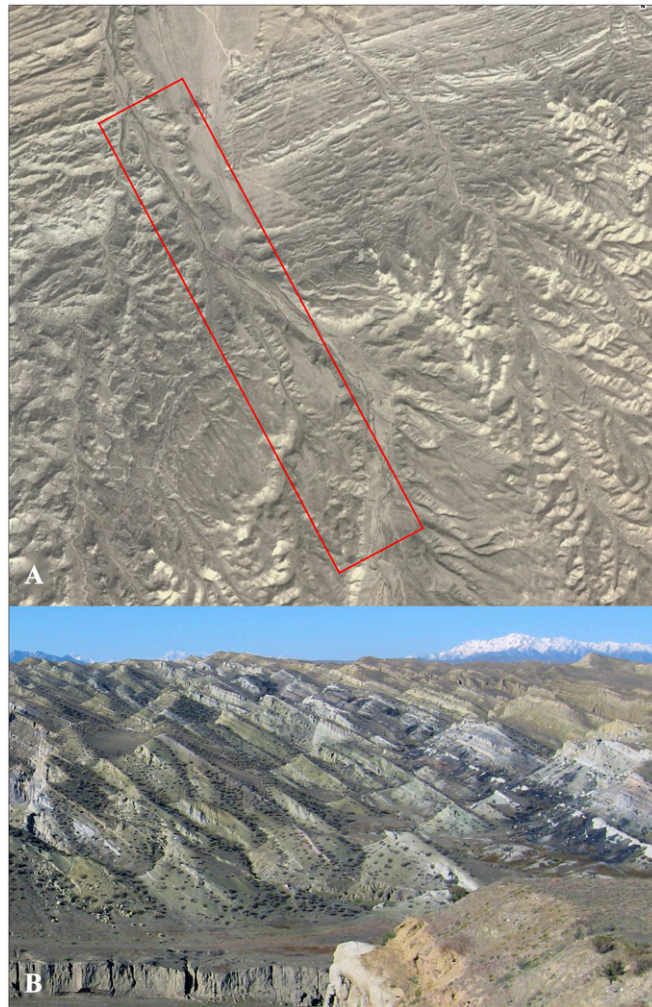

**Fig. S2.** Images of the Junggar Basin section. (A) GoogleEarth image of Haojiagou section (red box), the location of which is shown in Fig. S1, showing relatively undeformed strata tilting to the north-northeast. (B) Photograph of portion of the Haojiagou section including beds 45–53, looking west across the valley. The section was measured on the east side of Haojiagou from where the photograph was taken.

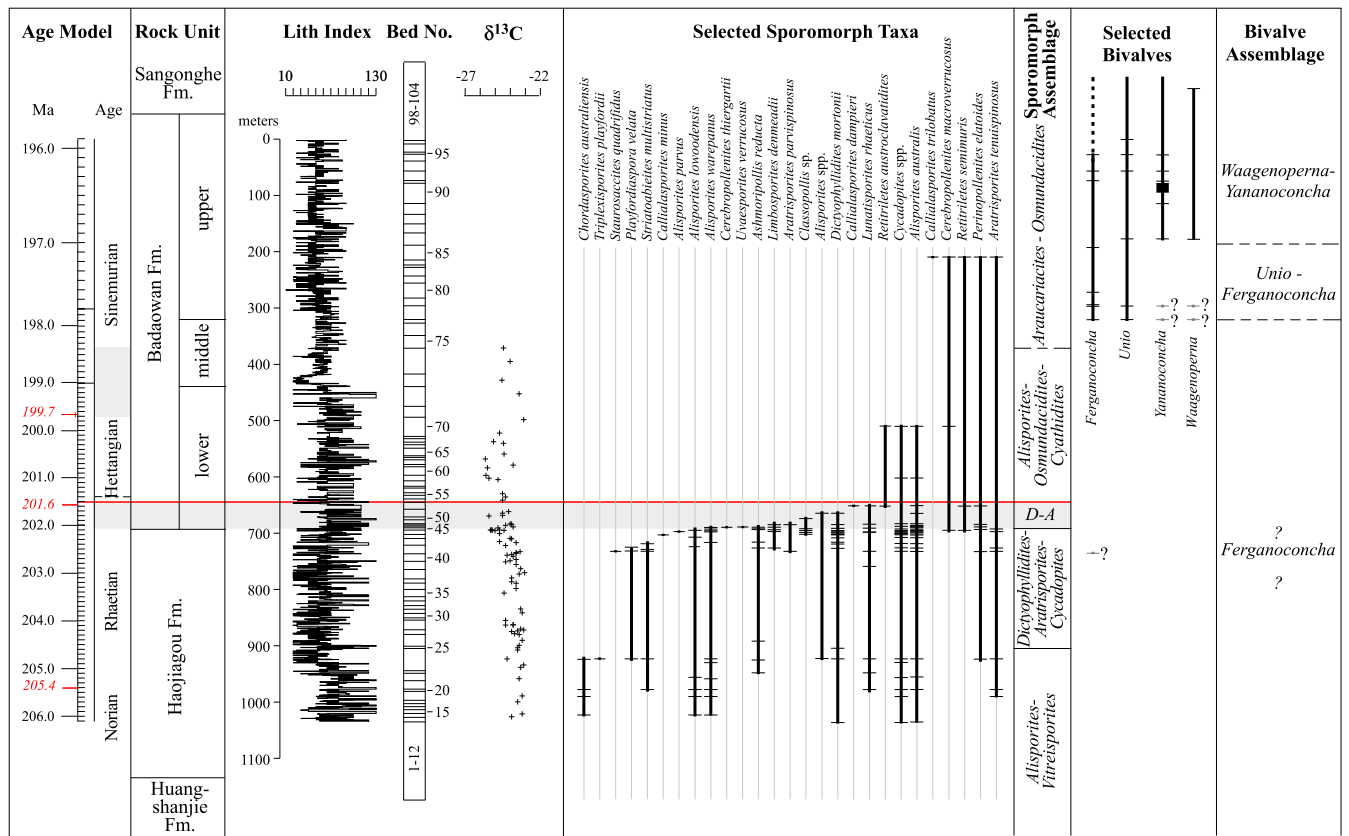

**Fig. S3.** Measured LITH index, simplified stratigraphic column, bed numbers, biostratigraphic data, and age model for the Haojiagou section. The occurrences of taxa are shown by ticks based on new counts, on which the new sporomorph assemblages are based. The red line marks the top of the range of *L. rhaeticus* in our studied section, the marker taxon used to correlate the lower Badaowan Formation to the eastern North American and United Kingdom sections (Fig. 4). The numerical ages in the age model are based on recognition of the 405-ky cycle in the MTM spectra, with the ages indicated in red representing the projections into the section of the initial end-Triassic extinction (201.6 Ma) and the Hettangian–Sinemurian boundary (199.7 Ma; thicker red bar indicated uncertainty from Fig. 4), and the Norian–Rhaetian boundary date is based on the Newark–Hartford APTS (interpreted by ref. 43) and the independent  $^{206}\text{Pb}/^{238}\text{U}$  zircon Pucara Basin ashes (35). Gray fill in the standard ages indicates the range of possible boundary picks internal to data from the Junggar Basin itself, and the dashed lines indicate stage boundaries as suggested in ref. 17. The  $\delta^{13}\text{C}$  data are from ref. 33. All data are registered to the bed numbers as measured by this field party in the Haojiagou section.

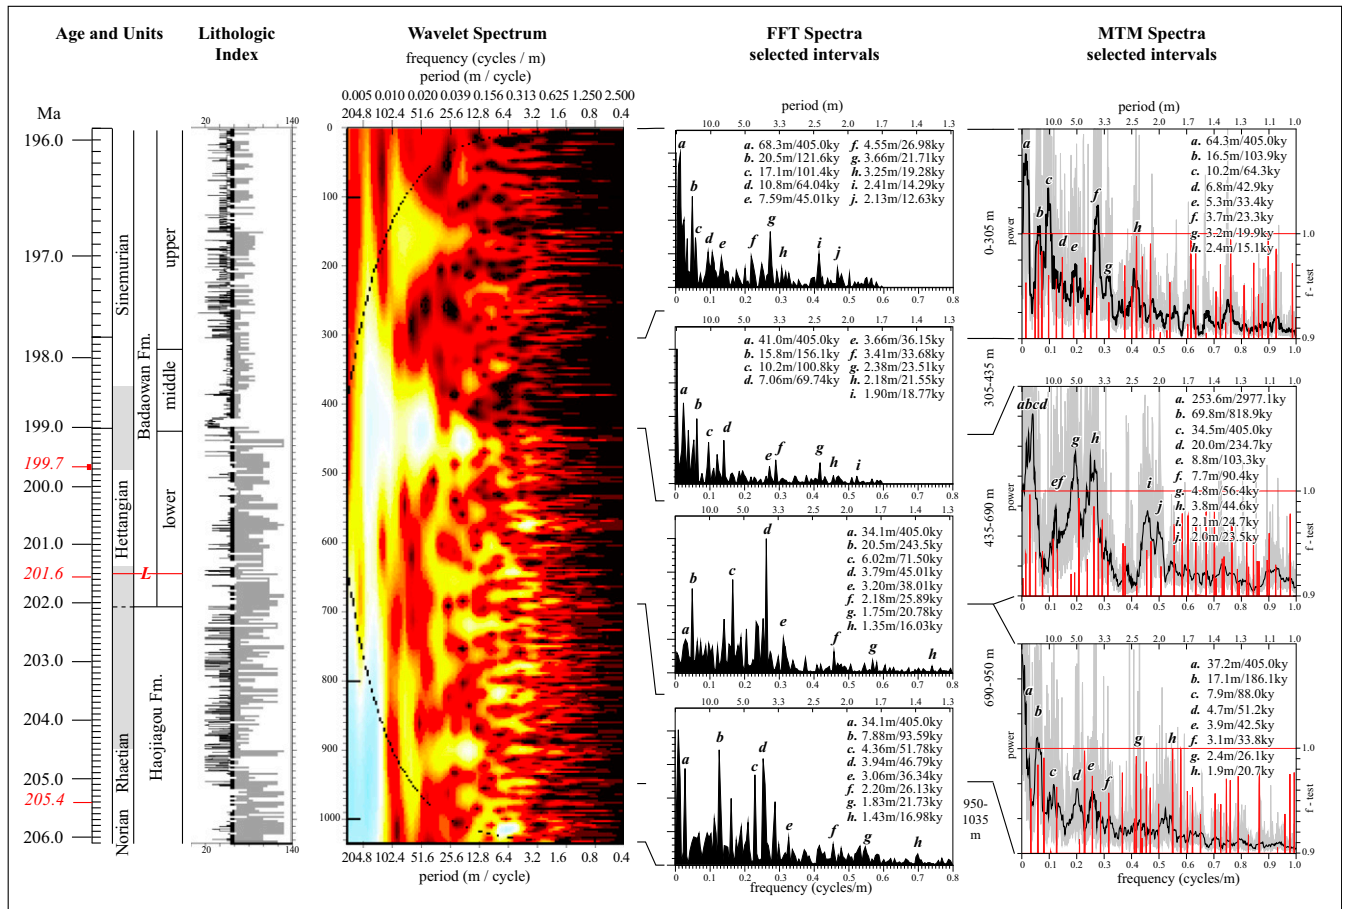

**Fig. S4.** Wavelet spectrum, FFT, and MTM spectral results from the clipped LITH scale (grayed part clipped off) of the upper part of the Haojiagou Formation through the upper member of the Badaowan Formation in the Haojiagou section. Conventions for temporal information are as in Fig. S3. In the evolutive FFT, white is the highest relative power and black is the lowest. In the FFT spectra, high-amplitude peaks are labeled with their periods in meters and ky (kiloyears) assuming recognition of the 405-ky cycle. In the MTM spectra, only those peaks in spectral power that have f-test significance above the 0.9 level and high amplitude are labeled, and they are labeled in meters and kiloyears based on recognition of the 405-ky level.



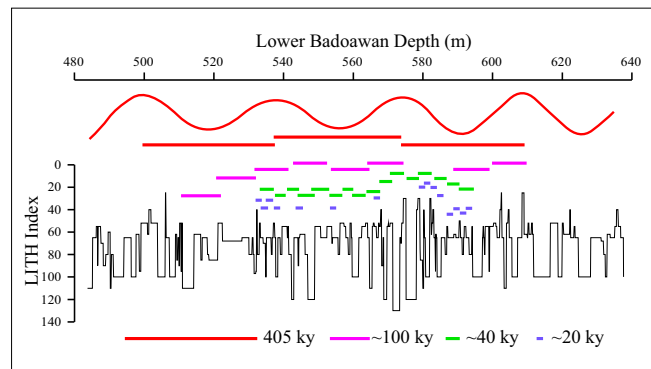

Fig. S7. The various major cycles discussed in this paper as they appear in the LITH index.

**Table S1. LITH index values (rock colors range from black to light gray)**

| Lithology                                | Environment                            | LITH value |
|------------------------------------------|----------------------------------------|------------|
| Coal or coal seam                        | Dysoxic sediment-starved lake or swamp | 10         |
| Shale, carbonaceous shale                | Dysoxic lake                           | 25         |
| Mudstone                                 | Shallow lake                           | 30         |
| Silty mudstone                           | Shallow lake                           | 40         |
| Muddy siltstone                          | Shallow lake or paleosol               | 50         |
| Fine-grained siltstone                   | Shallow lake or paleosol               | 55         |
| Medium-grained siltstone                 | Floodplain or paleosol                 | 60         |
| Coarse-grained siltstone                 | Floodplain or paleosol                 | 65         |
| Fine-grained sandstone                   | Floodplain and fluvial                 | 70         |
| Fine-grained sandstone                   | Fluvial                                | 80         |
| Medium-grained sandstone                 | Fluvial                                | 90         |
| Coarse-grained sandstone                 | Fluvial                                | 100        |
| Fine conglomerate: $\leq 4$ -cm clasts   | Fluvial                                | 110        |
| Medium conglomerate: $\leq 8$ -cm clasts | Fluvial                                | 120        |
| Coarse conglomerate: $> 8$ -cm clasts    | Fluvial                                | 130        |

**Table S2. U-Pb and astrochronological ages compared: Explanation**

| Horizon or unit                | Newark igneous U-Pb               | Newark–Hartford APTS            | Pucara Basin U-Pb              | Bristol Channel Basin Pucara*/Newark <sup>†</sup> |
|--------------------------------|-----------------------------------|---------------------------------|--------------------------------|---------------------------------------------------|
| Hettangian–Sinemurian boundary | Not applicable                    | 199.70 $\pm$ 0.02               | 199.46 $\pm$ 0.17 <sup>‡</sup> | 199.61/199.66                                     |
| Hook Mountain Basalt           | 200.916 $\pm$ 0.064 <sup>§</sup>  | 200.93 $\pm$ 0.02               | Not applicable                 | Not applicable                                    |
| Preakness Basalt               | 201.274 $\pm$ 0.032 <sup>¶</sup>  | 201.28 $\pm$ 0.02               | Not applicable                 | Not applicable                                    |
| Rhaetian–Hettangian boundary   | Not applicable                    | 201.42 $\pm$ 0.02               | 201.36 $\pm$ 0.14 <sup>#</sup> | 201.32/201.37                                     |
| Orange Mountain Basalt         | 201.520 $\pm$ 0.034 <sup>  </sup> | 201.52 $\pm$ 0.02 <sup>**</sup> | Not applicable                 | Not applicable                                    |
| End–Triassic extinction        | 201.564 $\pm$ 0.015 <sup>††</sup> | 201.56 $\pm$ 0.02 <sup>**</sup> | 201.51 $\pm$ 0.15              | 201.51/201.56                                     |

\*Using the Pucara ash-based ETE as a tie point (35).

<sup>†</sup>Using the Newark igneous-based ETE as a tie point (30).

<sup>‡</sup>Zircon <sup>206</sup>Pb/<sup>238</sup>U age of Pucara Basin ash LM4-19B at the Hettangian–Sinemurian boundary, originally published as 199.43  $\pm$  0.1 Ma (15) but adjusted here to 199.46  $\pm$  0.17 based on a regression of ages of ashes dated by both Guex et al. (36) and Wotzlaw et al. (35), the latter using updated EARTHTIME protocols ([www.earth-time.org](http://www.earth-time.org)). B. Schoene (pers. comm., 02/15) has recalculated this age using current EarthTime protocols as 199.51  $\pm$  0.10.

<sup>§</sup>Zircon <sup>206</sup>Pb/<sup>238</sup>U age of the Butner Diabase that applies to the Hook Mountain Basalt (30).

<sup>¶</sup>Zircon <sup>206</sup>Pb/<sup>238</sup>U age of flow 2 of the Preakness Basalt (30).

<sup>#</sup>Average age and rms error of marine Pucara Basin ashes LM4-100/101 and LM4-90 zircon <sup>206</sup>Pb/<sup>238</sup>U ages that bracket the ammonite-calibrated Triassic–Jurassic boundary (35).

<sup>||</sup>Zircon <sup>206</sup>Pb/<sup>238</sup>U age of the Palisade Sill that applies to the Orange Mountain Basalt (30).

<sup>\*\*</sup>Age of the Triassic–Jurassic boundary as projected into the Newark APTS (31).

<sup>††</sup>Age of the continental ETE in the basins of Eastern North America and Morocco derived from zircon <sup>206</sup>Pb/<sup>238</sup>U dates and astrochronology (30).

<sup>\*\*</sup>Rounded age of the continental ETE (30) used as a tie point for the Newark astrochronology.
